# Supplementary material for: Radical polymerisation of styrene in porous coordination polymers
Source: Royal Society of Chemistry journal article supplement (doi:10.1039/b508588h), 2005-01-01
Supplement: b508588h.pdf [file b508588h.pdf]

## Radical polymerisation of styrene in porous coordination polymers

Takashi Uemura, Kana Kitagawa, Satoshi Horike, Susumu Kitagawa, Motohiro Mizuno and Kazunaka Endo

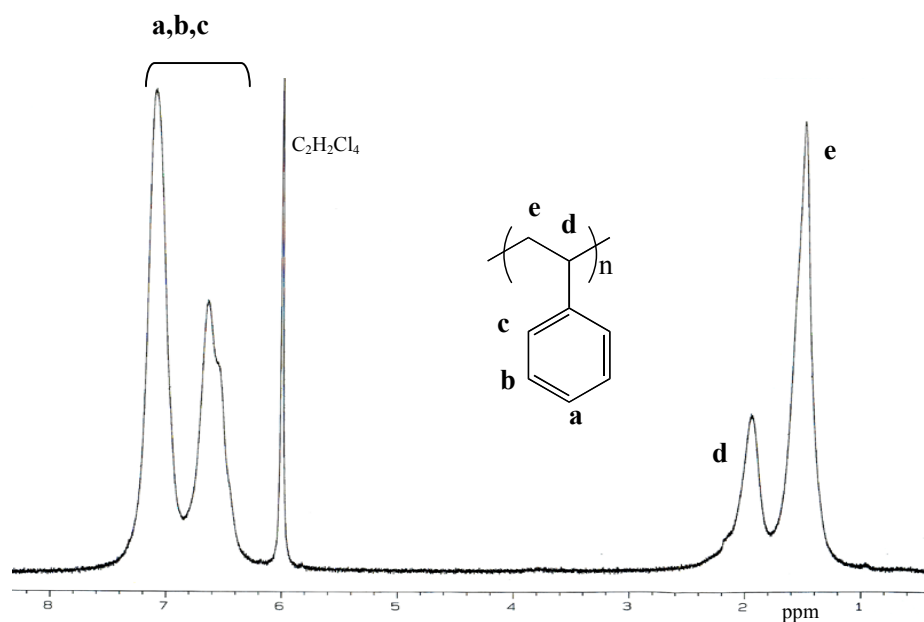

Figure 1.  $^1\text{H}$  NMR spectrum of the recovered PSt in tetrachloroethane- $d_2$ .

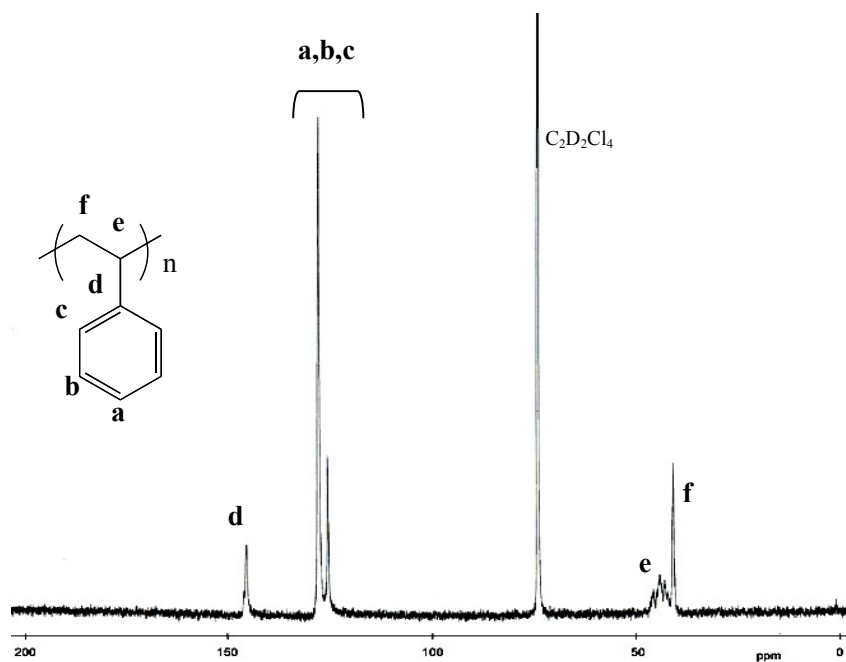

Figure 2.  $^{13}\text{C}$  NMR spectrum of the recovered PSt in tetrachloroethane- $d_2$ .

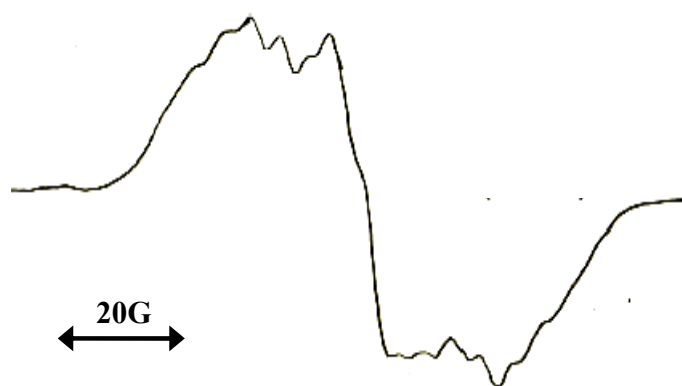

**Figure 3.** ESR spectrum of propagating radical of PSt in **1a** at 70 °C.

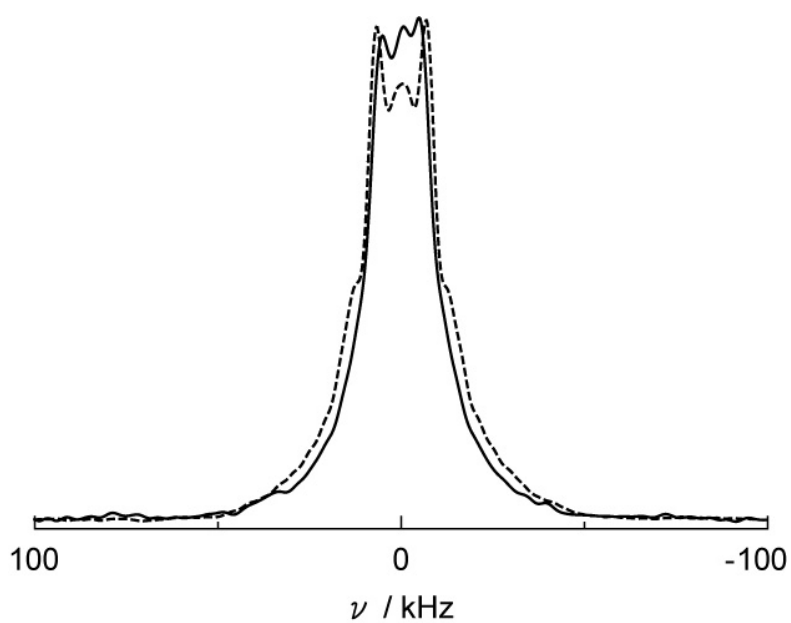

**Figure 4.** <sup>2</sup>H NMR spectra of styrene-*d*<sub>8</sub> adsorbed in **1a** (dot) and **1b** (black) at 20 °C.
